# Supplementary material for: Activation of immune receptor Rx1 triggers distinct immune responses culminating in cell death after 4 hours
Source: PubMed Central journal article supplement (PMC6637897; doi:10.1111/mpp.12776), 2019-01-30
Supplement: MPP-20-575-s007.pdf [file MPP-20-575-s007.pdf]

| Primer Name              | Primer Sequence (5' - 3') | Description                |
|--------------------------|---------------------------|----------------------------|
| FP6743-NbPR-1a-F         | TGCCTTCATTTCTTCTTGTC      | qRT-PCR                    |
| FP6744-NbPR-1a-R         | GTTATGGGCATCCAAATAGT      | A. Goverse WUR, pers. com. |
| FP6946-NbLOX-F           | AAAACCTATGCCTCAAGAAC      | qRT-PCR                    |
| FP6947-NbLOX-R           | ACTGCTGCATAGGCTTTGG       | Zhang et al.,2012          |
| FP6970-NbHIN1-F          | CATTAGTTCTATGGCTCGTT      | qRT-PCR                    |
| FP6971-NbHIN1-R          | ATGGCATCTGGTTTCCT         | Zhu et al., 2015           |
| FP8369-NbPP2A-F          | GACCCTGATGTTGATGTTTCGCT   | qRT-PCR and RT-PCR         |
| FP8370-NbPP2A-R          | GAGGGATTTGAAGAGAGATTTTC   | Liu et al., 2015           |
| FP8371-PVX-CP-F          | CACTGCAGGCGCAACTCC        | RT-PCR                     |
| FP8372-PVX-CP-R          | GTCGTTGGATTGYGCCCT        | Peiman & Xie 2006          |
| FP8391-NbEF1 $\alpha$ -F | AGCTTTACCTCCCAAGTCATC     | qRT-PCR and RT-PCR         |
| FP8392-NbEF1 $\alpha$ -R | AGAACGCCTGTCAATCTTGG      | Liu et al., 2015           |
| FP6745-NbMAP3Ka-F        | AGGAAATGGCGATAATAGGT      | qRT-PCR                    |
| FP6746-NbMAP3Ka-R        | AAAGGTGATGATGTGGTAGT      | del Pozo et al., 2004      |
| FP6972-NbAOX1b-F         | CTTCTTCAACGCCTATT         | qRT-PCR                    |
| FP6973-NbAOX1b-R         | CAGCCCTAACAACCAA          | Zhu et al., 2015           |
| FP6944-NbERF1-F          | GCTCTTAACGTCGGATGGTC      | qRT-PCR                    |
| FP6945-NbERF1-R          | AGCCAAACCCTAGCTCCATT      | Zhang et al.,2012          |
| FP6976-NbKu70-F          | AATGCCTCTGAGATGCCGTC      | qRT-PCR                    |
| FP6977-NbKu70-R          | GGTCCCAACAGATACCCAGC      | This study                 |
| FP6653-NbPR-1b-F         | GTTGGTGTGGCCCCATGAC       | qRT-PCR                    |
| FP6654-NbPR-1b-R         | CACATTTTTACGGCACCAGCG     | Zhang et al.,2012          |
| FP8594-NbPR-2b-F         | AGGTGTTTGCTATGGAATGC      | qRT-PCR                    |
| FP8595-NbPR-2b-R         | TCTGTACCCACCATCTTGC       | Zhang et al.,2012          |
| FP8596-NbPARP1-F         | CAGGATATATGTTTGGAAAGGGAC  | qRT-PCR                    |
| FP8597-NbPARP1-R         | AAGAATTGCAACTTTACTTGGGC   | This study                 |
| FP6659-PARP2-2-F         | TACATAGTTTACAACGTGGAG     | qRT-PCR                    |
| FP6660-PARP2-2-R         | ATACCAAATATCGGCAACG       | This study                 |

**Table S2. Primer list.** This table provides the name, sequence and description of all primers used in the qPCR experiment shown in Figure 1a.
